# Supplementary material
Source: PubMed Central journal article supplement (PMC2922129)
Supplement: 1007394107_pnas.201007394SI.pdf [file 1007394107_pnas.201007394SI.pdf]

# Supporting Information

Lázár-Molnár et al. 10.1073/pnas.1007394107

## SI Materials and Methods

**Bacterial Strains.** Virulent *M. tuberculosis* H37Rv (obtained from Trudeau Institute) strain has been described previously. Bacteria were grown in Middlebrook 7H9 broth supplemented with 10% (vol/vol) oleic acid–albumin–dextrose–catalase (OADC), 0.5% (vol/vol) glycerol, and 0.05% (vol/vol) Tween-80 supplemented with lysine and pantothenate. Middlebrook 7H10, supplemented with 10% (vol/vol) OADC, 0.5% (vol/vol) glycerol, and 0.05% (vol/vol) Tween-80, was used as solid media for CFU assessment.

**Aerosol Challenge and Bacterial Loads in Tissues.** All animal studies were approved by the institutional animal care and use committees of the AECOM. Aerogenic challenge was done using a Baker-Madison chamber to deliver a low dose of the *M. tuberculosis* H37Rv strain. A suspension of  $10^6$  CFU/mL in PBS containing 0.05% Tween-80 and 0.004% antifoam (Sigma Aldrich) was used as the inoculum. Four mice from each infection group were killed 24 h after aerosol challenge, and lung homogenates were plated on 7H9-agar plates to determine the efficiency of aerosol delivery of *M. tuberculosis*. The doses delivered were between 50 and 320 CFU per lung *M. tuberculosis* H37Rv. At different timepoints postchallenge, four to five mice from each challenged group were killed to determine organ bacterial loads in the lung, liver, and spleen. Organs of individual mice were aseptically removed and homogenized separately in 5 mL PBS plus 0.05% Tween-80, using a Seward Stomacher 80 blender (Seward Limited). The homogenates were diluted serially and plated on Middlebrook 7H9-agar plates supplemented with OADC, glycerol, and Tween-80, as described above. Agar plates were incubated at 37 °C for 3–4 wk before CFUs were assessed. Ten to 15 mice from each group were used to determine survival times of infected mice.

**Histology.** For histological analysis, mice were humanely euthanized at various timepoints after infection, and the lungs, liver, and spleen were removed and placed into 10% neutral buffered formalin (Fischer Scientific). Four to five mice were used for each timepoint for each group. Tissue samples were then routinely processed for paraffin embedding. Five-micrometer thickness tissue sections were cut, dewaxed, rehydrated through graded alcohols, and stained with either hematoxylin and eosin (HE) or acid fast bacillus (AFB) stain for identification of bacterial cells.

**Immunohistochemistry.** Paraffin sections were melted at 60 °C for 30 min and deparaffinized in xylene, then rehydrated through graded alcohols to water, and washed in TBS (Tris buffer saline). Slides were pretreated with 0.3% hydrogen peroxide for 10 min, then washed in TBS. Antigen retrieval was performed using 10 mM sodium citrate buffer pH 6.0 in a steamer for 20 min, followed by cooling at RT room temperature (RT) for 30 min. Slides were blocked in 5% normal donkey serum and 2% BSA for 1 h at RT before incubating with antibodies for 1 h at RT. To detect B cells, purified rat antibody to mouse B220 (BD Pharmingen) was used 1/50, diluted in blocking solution. T cells were detected by using polyclonal rabbit anti-CD3 ready to use (DAKO). Slides were washed four times, 3 min each with TBS before applying biotin-labeled secondary antibody (goat anti-rat or goat anti-rabbit, DAKO) at 1/300 for 1 h at RT. Slides were washed again and incubated for 20 min with the avidin-biotin-HRP complex, as directed by the supplier (VECTOR). Slides were washed in TBS and DAB applied (VECTOR) for 2 min before lightly counterstaining them with Harris Hematoxylin (Poly Scientific).

**FACS Analysis.** Mice were euthanized and lungs were removed after cardiac perfusion with 1× PBS. Lungs were cut into small pieces (~1 mm<sup>3</sup>) and digested in DMEM containing 5% FCS, 1 mg/mL collagenase, and 0.5 mg/mL DNase at 37 °C for 45 min. The digest was further passed through a 0.45-mm strainer using the plunger of a 3-mL syringe. The lung cell suspension was washed and counted by trypan blue exclusion of dead cells. FACS staining was performed after blocking Fc receptors, by using the following antibodies: CD4-PE, CD8-FITC, CD11b-PE, and B220-FITC from BD Biosciences; purified anti-mouse CD16/CD32; and Gr-1-APC from eBioscience.

**Cytokine Measurements.** Blood samples were collected from groups of PD-1<sup>-/-</sup> and C57BL/6 mice infected with *M. tuberculosis* H37Rv (50 CFU per lung) at 2, 4, and 8 wk postinfection and from uninfected mice as well, by retro-orbital bleeding. Sera from five mice were collected in each group at each timepoint. Sera were separated by centrifugation using prepared microtubes (Sarstedt). Serum cytokines were measured using the mouse proinflammatory 7-plex kit (Meso Scale Discovery), according to the manufacturer's protocol. Minimum detection levels for the individual cytokines were: 4 pg/mL for TNF- $\alpha$ , 30 pg/mL for IL-6, 2 pg/mL for IFN- $\gamma$ , 50 pg/mL for IL-12 p70, and 10 pg/mL for IL-10. IL-17 was measured using the Quantikine ELISA kit (R&D Systems and ELISA kit from eBioscience, respectively).

For lung cytokine measurements, lungs were removed and homogenized immediately in 2.5 mL 1× PBS containing 0.05% Tween-80, using a Seward Stomacher 80 blender (Seward Limited). The homogenate was centrifuged for 10 min at 13,000 rpm, the supernatant was removed and filtered through 0.2-mm microfilters, and stored at –80 °C. Cytokines were measured as described above. Groups of four mice were analyzed at each timepoint.

**RNA Extraction and Microarray Experiments.** Whole lungs from PD-1<sup>-/-</sup> and C57BL/6 mice infected with *M. tuberculosis* H37Rv (173 CFU per lung), as well as from uninfected mice were removed at 4 wk postinfection, and immediately placed in RNAlater (Qiagen). Lungs from three mice per group were used for total RNA extraction using RNeasy Protect mini kit (Qiagen), based on the manufacturer's recommendation, followed by DNase digest (Ambion/Applied Biosystems). The integrity of the RNA was verified using the Agilent 2100 Bioanalyzer. A total of 100 ng of total RNA from each sample was labeled using standard protocols from the manufacturer (Affymetrix). Briefly, RNA was transcribed using T7-(N)<sub>6</sub> primers (250 ng/ $\mu$ L) followed by cDNA synthesis and amplification. The cDNA was then used directly in an in vitro transcription reaction, followed again by cDNA synthesis using random primers, in the presence of dUTP. After hydrolysis of cRNA, single-stranded DNA was fragmented by breaking at each incorporated dUTP residue, and applied for labeling in the presence of terminal deoxynucleotidyl transferase (TdT) and biotin-coupled labeling reagent. Each fragmented and terminally labeled cDNA sample was hybridized onto a GeneChip Mouse Gene 1.0 ST array (Affymetrix) for 17 h, followed by washing and staining steps, and scanned using an Affymetrix GeneChip fluidic station and scanner.

**Microarray Data Analysis.** The raw array data were imported into Expression Console v1.1 (Affymetrix), and normalized after quality control. The data were ranked using LIMMA (R package) analysis for comparison of different groups. There were three technical replicates for each group, which were averaged for fold-change study. Statistical significance was set to  $P < 0.05$  by applying *t*-test analysis adjusted for multiple comparisons. Data were ex-

ported from R package to Excel and analyzed further. Gene intensity changes higher than twofold were accepted as biologically significant. Tables of genes were compiled on the basis of GO

organizing principles such as biological process or molecular function. Hierarchical cluster analysis was performed using CLUSTER 3.0; the results are shown using TreeView software.

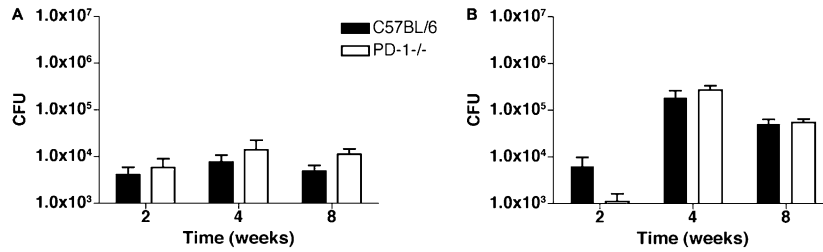

**Fig. S1.** Bacterial loads in the liver (A) and spleen (B) of PD-1<sup>-/-</sup> and control mice infected with *M. tuberculosis* aerosol. CFU values were determined at 2, 4, and 8 wk after low-dose H37Rv aerosol infection (50 CFU). Mean values of five mice at each timepoint are shown  $\pm$  SD.

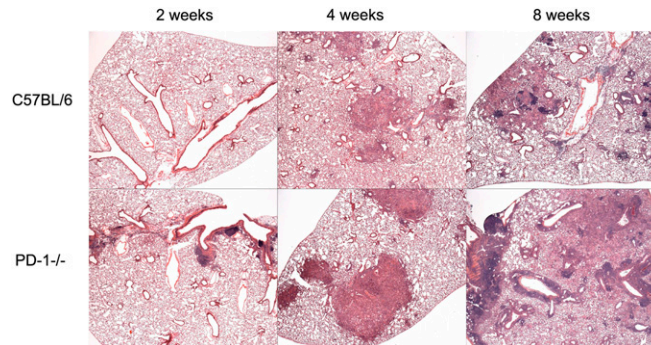

**Fig. S2.** Necrotic pneumonia develops in the lungs of PD-1<sup>-/-</sup> mice infected with *M. tuberculosis* H37Rv aerosol, by 4 wk postinfection. HE stains of lungs from mice infected with 50 CFU/mouse are shown at 2, 4, and 8 wk postinfection. (Upper) C57BL/6 mice. (Lower) PD-1<sup>-/-</sup> mice. At 2 wk postinfection, two out of five PD-1<sup>-/-</sup> mice had prominent bronchiolar-associated lymphoid tissue (BALT) as shown here, which was not observed in the wild-type lungs, 25 $\times$  magnification.

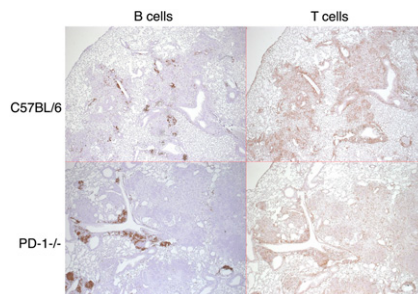

**Fig. S3.** Immunohistochemical staining of the lungs 4 wk postinfection with *M. tuberculosis* H37Rv aerosol. B cells formed prominent clusters in the lungs of PD-1<sup>-/-</sup> mice (Left), but they were largely absent from the necrotic nodules. Similarly, lower numbers of T cells were infiltrating the pyogranulomatous nodules in the PD-1<sup>-/-</sup> mice, compared with the wild-type mice (Right),  $\times$ 40 magnification.



**Table S1. Differential expression of genes regulating immune, inflammatory, and defense responses in *M. tuberculosis*-infected PD-1<sup>-/-</sup> versus control mice**

| Function                                 | Fold change<br>(log 2) | Adj. <i>P</i> | Description                                                    | GeneBank accession no. |
|------------------------------------------|------------------------|---------------|----------------------------------------------------------------|------------------------|
| <b>Immune and inflammatory responses</b> |                        |               |                                                                |                        |
| S100a9                                   | 3.56                   | 0.024         | S100 calcium binding protein A9 (calgranulin B)                | NM_009114              |
| S100a8                                   | 3.43                   | 0.024         | S100 calcium binding protein A8 (calgranulin A)                | NM_013650              |
| Orm1                                     | 2.42                   | 0.022         | Orosomuroid 1                                                  | NM_008768              |
| A2m                                      | 2.41                   | 0.011         | Alpha-2-macroglobulin                                          | NM_175628              |
| Orm3                                     | 2.30                   | 0.033         | Orosomuroid 3                                                  | NM_013623              |
| Selp                                     | 1.94                   | 0.032         | Selectin, platelet                                             | NM_011347              |
| Fpr1                                     | 1.87                   | 0.046         | Formyl peptide receptor 1                                      | NM_013521              |
| Spp1                                     | 1.86                   | 0.049         | Secreted phosphoprotein 1                                      | NM_009263              |
| Clec4d                                   | 1.71                   | 0.044         | C-type lectin domain family 4, member d                        | NM_010819              |
| C5ar1                                    | 1.62                   | 0.032         | Complement component 5a receptor 1                             | NM_007577              |
| Cd300lf                                  | 1.61                   | 0.049         | CD300 antigen like family member F                             | NM_145634              |
| Orm2                                     | 1.56                   | 0.017         | Orosomuroid 2                                                  | NM_011016              |
| Hdc                                      | 1.55                   | 0.039         | Histidine decarboxylase                                        | NM_008230              |
| Il11                                     | 1.27                   | 0.033         | Interleukin 11                                                 | NM_008350              |
| Ptafr                                    | 1.25                   | 0.035         | Platelet-activating factor receptor                            | NM_001081211           |
| Clec4e                                   | 1.20                   | 0.041         | C-type lectin domain family 4, member e                        | NM_019948              |
| Il7r                                     | 1.18                   | 0.036         | Interleukin 7 receptor                                         | NM_008372              |
| Pram1                                    | 1.18                   | 0.046         | PML-RAR alpha-regulated adaptor molecule 1                     | NM_001002842           |
| Il1rap                                   | 1.17                   | 0.032         | Interleukin 1 receptor accessory protein, transcript variant 1 | NM_008364              |
| Clec4n                                   | 1.17                   | 0.034         | C-type lectin domain family 4, member n                        | NM_020001              |
| Cd38                                     | 1.05                   | 0.023         | CD38 antigen                                                   | NM_007646              |
| Sh2d1b1                                  | -1.06                  | 0.048         | SH2 domain protein 1B1                                         | NM_012009              |
| Trat1                                    | -1.08                  | 0.026         | T cell receptor associated transmembrane adaptor 1             | NM_198297              |
| Klrg1                                    | -2.09                  | 0.032         | Killer cell lectin-like receptor subfamily G, member 1         | NM_016970              |
| Hc                                       | -3.07                  | 0.039         | Hemolytic complement                                           | NM_010406              |
| <b>Defense response</b>                  |                        |               |                                                                |                        |
| Cd14                                     | 2.28                   | 0.031         | CD14 antigen                                                   | NM_009841              |
| Irg1                                     | 1.85                   | 0.032         | Immunoresponsive gene 1                                        | NM_008392              |
| Ifitm1                                   | 1.60                   | 0.032         | IFN induced transmembrane protein 1, transcript variant 1      | NM_026820              |
| Ptx3                                     | 1.45                   | 0.043         | Pentraxin related gene                                         | NM_008987              |
| Ifitm1                                   | 1.29                   | 0.031         | IFN induced transmembrane protein 1, transcript variant 1      | NM_026820              |
| Pglyrp1                                  | 1.26                   | 0.032         | Peptidoglycan recognition protein 1                            | NM_009402              |
| Tlr13                                    | 1.21                   | 0.023         | Toll-like receptor 13                                          | NM_205820              |
| Rsad2                                    | 1.15                   | 0.042         | Radical S-adenosyl methionine domain containing 2              | NM_021384              |
| Adm                                      | 1.13                   | 0.032         | Adrenomedullin                                                 | NM_009627              |
| Tlr11                                    | -1.02                  | 0.035         | Toll-like receptor 11                                          | NM_205819              |
| Ncr1                                     | -1.15                  | 0.035         | Natural cytotoxicity triggering receptor 1                     | NM_010746              |
| Lyz1                                     | -1.20                  | 0.041         | Lysozyme 1                                                     | NM_013590              |
| Klra8                                    | -1.32                  | 0.035         | Killer cell lectin-like receptor, subfamily A, member 8        | NM_010650              |

**Table S2. Differential gene expression in the lungs of *M. tuberculosis*-infected PD-1<sup>-/-</sup> mice, compared with control mice**

| Function/gene name         | Fold change<br>(log 2) | Adj. <i>P</i> | Description                                                                                     | GeneBank accession no. |
|----------------------------|------------------------|---------------|-------------------------------------------------------------------------------------------------|------------------------|
| <b>Proteolysis</b>         |                        |               |                                                                                                 |                        |
| Asprv1                     | 4.26                   | 0.027         | Aspartic peptidase, retroviral-like 1                                                           | NM_026414              |
| Mmp8                       | 3.75                   | 0.025         | Matrix metalloproteinase 8                                                                      | NM_008611              |
| Ctse                       | 2.89                   | 0.002         | Cathepsin E                                                                                     | NM_007799              |
| Mmp9                       | 2.39                   | 0.033         | Matrix metalloproteinase 9                                                                      | NM_013599              |
| Mmp10                      | 1.91                   | 0.016         | Matrix metalloproteinase 10                                                                     | NM_019471              |
| Mmp12                      | 1.37                   | 0.044         | Matrix metalloproteinase 12                                                                     | NM_008605              |
| Adam8                      | 1.34                   | 0.037         | A disintegrin and metalloproteinase domain 8                                                    | NM_007403              |
| Pappa                      | 1.21                   | 0.029         | Pregnancy-associated plasma protein A                                                           | NM_021362              |
| Mmp13                      | 1.16                   | 0.036         | Matrix metalloproteinase 13                                                                     | NM_008607              |
| Adamts10                   | -1.01                  | 0.031         | A disintegrin-like and metalloproteinase (reprolysin type) with thrombospondin type 1 motif, 10 | NM_172619              |
| Mme                        | -1.21                  | 0.024         | Membrane metallo endopeptidase                                                                  | NM_008604              |
| Tinag                      | -1.89                  | 0.033         | Tubulointerstitial nephritis antigen                                                            | NM_012033              |
| <b>Protease inhibitors</b> |                        |               |                                                                                                 |                        |
| Serpina3m                  | 1.80                   | 0.018         | Serine (or cysteine) peptidase inhibitor, clade A, member 3M                                    | NM_009253              |
| Timp1                      | 1.58                   | 0.032         | Tissue inhibitor of metalloproteinase 1 (Timp1), transcript variant 1                           | NM_001044384           |
| Serpina3n                  | 1.52                   | 0.022         | Serine (or cysteine) peptidase inhibitor, clade A, member 3N                                    | NM_009252              |
| <b>Cell adhesion</b>       |                        |               |                                                                                                 |                        |
| Chl1                       | 1.85                   | 0.024         | Cell adhesion molecule with homology to L1CAM                                                   | NM_007697              |
| Itgam                      | 1.55                   | 0.035         | Integrin alpha M, transcript variant 1                                                          | NM_001082960           |
| Tnc                        | 1.53                   | 0.033         | Tenascin C                                                                                      | NM_011607              |
| Emilin2                    | 1.34                   | 0.035         | Elastin microfibril interfacier 2                                                               | NM_145158              |
| Cd33                       | 1.28                   | 0.047         | CD33 antigen (Cd33), transcript variant 1                                                       | NM_001111058           |
| Csf3r                      | 1.11                   | 0.025         | Colony stimulating factor 3 receptor (granulocyte)                                              | NM_007782              |
| Ninj1                      | 1.05                   | 0.032         | Ninjurin 1                                                                                      | NM_013610              |
| Postn                      | -1.10                  | 0.036         | Periostin, osteoblast specific factor                                                           | NM_015784              |
| Lama3                      | -1.22                  | 0.031         | Isoform B of Laminin subunit alpha-3 precursor gene                                             | ENSMUST00000092070     |
| Dpt                        | -1.24                  | 0.033         | Dermatopontin                                                                                   | NM_019759              |
| Thbs3                      | -1.27                  | 0.018         | Thrombospondin 3                                                                                | NM_013691              |
| Tnxb                       | -1.54                  | 0.018         | Tenascin XB                                                                                     | NM_031176              |
| Itga8                      | -1.88                  | 0.034         | Integrin alpha 8                                                                                | NM_001001309           |
| <b>Blood coagulation</b>   |                        |               |                                                                                                 |                        |
| F13a1                      | 1.81                   | 0.035         | Coagulation factor XIII, A1 subunit                                                             | NM_028784              |
| F3                         | 1.20                   | 0.034         | Coagulation factor III                                                                          | NM_010171              |
| <b>Signal transduction</b> |                        |               |                                                                                                 |                        |
| Mrgpra2                    | 3.03                   | 0.031         | MAS-related GPR, member A2                                                                      | NM_153101              |
| Mrgpra2                    | 2.89                   | 0.032         | MAS-related GPR, member A2                                                                      | NM_153101              |
| Gpr109a                    | 2.78                   | 0.031         | G protein-coupled receptor 109A                                                                 | NM_030701              |
| Rhov                       | 1.73                   | 0.041         | Ras homolog gene family, member V                                                               | NM_145530              |
| Plaur                      | 1.60                   | 0.046         | Plasminogen activator, urokinase receptor                                                       | NM_011113              |
| Rnd1                       | 1.46                   | 0.040         | Rho family GTPase 1                                                                             | NM_172612              |
| Angptl4                    | 1.20                   | 0.022         | Angiopoietin-like 4                                                                             | NM_020581              |
| P2ry13                     | 1.11                   | 0.022         | Purinergic receptor P2Y, G protein coupled 13                                                   | NM_028808              |
| Ms4a6d                     | 1.05                   | 0.034         | Membrane-spanning 4-domains, subfamily A, member 6D                                             | NM_026835              |
| Rasd1                      | 1.04                   | 0.042         | RAS, dexamethasone-induced 1                                                                    | NM_009026              |
| Glp1r                      | -1.04                  | 0.035         | Glucagon-like peptide 1 receptor                                                                | NM_021332              |
| Gfra2                      | -1.05                  | 0.027         | Glial cell line derived neurotrophic factor family receptor alpha 2                             | NM_008115              |
| Gpr33                      | -1.07                  | 0.033         | G protein-coupled receptor 33                                                                   | NM_008159              |
| Agtrl1                     | -1.32                  | 0.032         | Angiotensin receptor-like 1                                                                     | NM_011784              |
| Ltbp4                      | -1.59                  | 0.031         | Latent transforming growth factor beta binding protein 4, transcript variant 1                  | NM_175641              |
| <b>Angiogenesis</b>        |                        |               |                                                                                                 |                        |
| Serpine1                   | 1.83                   | 0.032         | Serine (or cysteine) peptidase inhibitor, clade E, member 1                                     | NM_008871              |
| Ereg                       | 1.66                   | 0.036         | Epiregulin                                                                                      | NM_007950              |
| Edn1                       | 1.56                   | 0.042         | Endothelin 1                                                                                    | NM_010104              |
| Lox                        | 1.22                   | 0.011         | Lysyl oxidase                                                                                   | NM_010728              |
| Enpep                      | -1.36                  | 0.034         | Glutamyl aminopeptidase                                                                         | NM_007934              |
| Nppa                       | -1.57                  | 0.037         | Natriuretic peptide precursor type A                                                            | NM_008725              |
| <b>Apoptosis</b>           |                        |               |                                                                                                 |                        |
| Egln3                      | 1.84                   | 0.041         | EGL nine homolog 3 ( <i>C. elegans</i> )                                                        | NM_028133              |



Table S2. Cont.

| Function/gene name          | Fold change (log 2) | Adj. P | Description                                                                     | GeneBank accession no. |
|-----------------------------|---------------------|--------|---------------------------------------------------------------------------------|------------------------|
| Nlrp3                       | 1.67                | 0.044  | NLR family, pyrin domain containing 3                                           | NM_145827              |
| Fbxl5                       | 1.65                | 0.029  | F-box and leucine-rich repeat protein 5                                         | NM_178729              |
| Tnfrsf3                     | 1.19                | 0.035  | Tumor necrosis factor, alpha-induced protein 3                                  | NM_009397              |
| Actc1                       | -1.64               | 0.033  | Actin, alpha, cardiac                                                           | NM_009608              |
| Transport                   |                     |        |                                                                                 |                        |
| Slc7a11                     | 1.99                | 0.046  | Solute carrier family 7 (cationic amino acid transporter, y+ system), member 11 | NM_011990              |
| Clca4                       | 1.67                | 0.033  | Chloride channel calcium activated 4                                            | NM_139148              |
| Marco                       | 1.61                | 0.046  | Macrophage receptor with collagenous structure                                  | NM_010766              |
| Slc40a1                     | 1.61                | 0.008  | Solute carrier family 40 (iron-regulated transporter), member 1                 | NM_016917              |
| Slc16a3                     | 1.31                | 0.040  | Solute carrier family 16 (monocarboxylic acid transporters), member 3           | NM_001038653           |
| Msr1                        | 1.26                | 0.036  | Macrophage scavenger receptor 1, transcript variant 1                           | NM_031195              |
| Ltf                         | 1.25                | 0.037  | Lactotransferrin                                                                | NM_008522              |
| Slc39a14                    | 1.25                | 0.026  | Solute carrier family 39 (zinc transporter), member 14                          | NM_144808              |
| Glrx                        | 1.20                | 0.034  | Glutaredoxin                                                                    | NM_053108              |
| Slc2a1                      | 1.14                | 0.043  | Solute carrier family 2 (facilitated glucose transporter), member 1             | NM_011400              |
| Slc16a1                     | 1.06                | 0.011  | Solute carrier family 16 (monocarboxylic acid transporters), member 1           | NM_009196              |
| Scn7a                       | -1.67               | 0.032  | Sodium channel, voltage-gated, type VII, alpha                                  | NM_009135              |
| Abca8a                      | -1.68               | 0.042  | ATP-binding cassette, subfamily A (ABC1), member 8a                             | NM_153145              |
| Regulation of transcription |                     |        |                                                                                 |                        |
| Padi4                       | 1.58                | 0.040  | Peptidyl arginine deiminase, type IV                                            | NM_011061              |
| Mxd1                        | 1.57                | 0.027  | MAX dimerization protein 1                                                      | NM_010751              |
| Basp1                       | 1.10                | 0.033  | Brain abundant, membrane attached signal protein 1                              | NM_027395              |
| Ankrd22                     | 1.09                | 0.043  | Ankyrin repeat domain 22                                                        | NM_024204              |
| Nfil3                       | 1.05                | 0.032  | Nuclear factor, interleukin 3, regulated                                        | NM_017373              |
| Rbpjl                       | -1.03               | 0.018  | Recombination signal binding protein for Ig kappa J region-like                 | NM_009036              |
| Nr1d1                       | -1.15               | 0.025  | Nuclear receptor subfamily 1, group D, member 1                                 | NM_145434              |
| Metabolic processes         |                     |        |                                                                                 |                        |
| Arg1                        | 3.30                | 0.006  | Arginase 1, liver                                                               | NM_007482              |
| Dhrs9                       | 2.20                | 0.025  | Dehydrogenase/reductase (SDR family) member 9                                   | NM_175512              |
| Upp1                        | 1.93                | 0.033  | Uridine phosphorylase 1                                                         | NM_009477              |
| Mgam                        | 1.89                | 0.044  | similar to maltase-glucoamylase gene:ENSMUSG00000068587                         | ENSMUST00000071535     |
| Arg2                        | 1.86                | 0.033  | Arginase type II (Arg2)                                                         | NM_009705              |
| Hmox1                       | 1.71                | 0.036  | Heme oxygenase (decycling) 1                                                    | NM_010442              |
| Smox                        | 1.66                | 0.032  | Spermine oxidase                                                                | NM_145533              |
| Agpat9                      | 1.34                | 0.043  | 1-acylglycerol-3-phosphate O-acyltransferase 9, transcript variant 1            | NM_172715              |
| Pygl                        | 1.22                | 0.039  | Liver glycogen phosphorylase                                                    | NM_133198              |
| Ptges                       | 1.21                | 0.040  | Prostaglandin E synthase                                                        | NM_022415              |
| Pdk4                        | 1.16                | 0.018  | Pyruvate dehydrogenase kinase, isoenzyme 4                                      | NM_013743              |
| Gla                         | 1.08                | 0.036  | Galactosidase, alpha                                                            | NM_013463              |
| Il4i1                       | 1.07                | 0.034  | Interleukin 4 induced 1                                                         | NM_010215              |
| Pdzd2                       | -1.10               | 0.036  | PDZ domain containing 2                                                         | NM_001081064           |
| Lrp2                        | -1.20               | 0.031  | Low density lipoprotein receptor-related protein 2                              | NM_001081088           |
| Car3                        | -1.69               | 0.010  | Carbonic anhydrase 3                                                            | NM_007606              |
| Adh1                        | -1.81               | 0.032  | Alcohol dehydrogenase 1 (class I)                                               | NM_007409              |
| Lipid metabolism            |                     |        |                                                                                 |                        |
| Pla1a                       | 1.12                | 0.028  | Phospholipase A1 member A                                                       | NM_134102              |
| Cyp7b1                      | 1.09                | 0.029  | Cytochrome P450, family 7, subfamily b, polypeptide 1                           | NM_007825              |
| Apoc2                       | 1.07                | 0.029  | Apolipoprotein C-II                                                             | NM_009695              |
| Adfp                        | 1.03                | 0.024  | Adipose differentiation related protein                                         | NM_007408              |
| Acox1                       | -1.55               | 0.033  | Acyl-CoA oxidase-like                                                           | NM_028765              |
| Metal ion homeostasis       |                     |        |                                                                                 |                        |
| Mt2                         | 2.32                | 0.049  | Metallothionein 2                                                               | NM_008630              |
| Mt1                         | 1.41                | 0.044  | Metallothionein 1                                                               | NM_013602              |
| Regulation of cell growth   |                     |        |                                                                                 |                        |
| Socs3                       | 1.29                | 0.033  | Suppressor of cytokine signaling 3 (Socs3)                                      | NM_007707              |
| Socs3                       | 1.06                | 0.032  | EF-10 mRNA                                                                      | U72673                 |
| Igfbp2                      | -1.53               | 0.025  | Insulin-like growth factor binding protein 2                                    | NM_008342              |

**Table S3. Gene expression differences in the lungs of uninfected PD-1<sup>-/-</sup> and C57BL/6 mice**

| Gene   | Fold change (log 2) | Adj. <i>P</i> | Description                                                       | GenBank accession no. |
|--------|---------------------|---------------|-------------------------------------------------------------------|-----------------------|
| Ctse   | 1.98                | 0.005         | Cathepsin E                                                       | NM_007799             |
| Snrpe  | 1.17                | 0.018         | Small nuclear ribonucleoprotein E                                 | NM_009227             |
| Nnt    | 1.05                | 0.002         | Nicotinamide nucleotide transhydrogenase,<br>transcript variant 2 | NR_003544             |
| Erd1   | -1.97               | 0.028         | Erythroid differentiation regulator 1                             | NM_133362.1           |
| Hspa1b | -1.62               | 0.005         | Heat shock protein 1B                                             | NM_010478             |
| Hspa1a | -1.50               | 0.012         | Heat shock protein 1A                                             | NM_010479             |
